# Supplementary material for: Role of nearshore benthic algae in the Lake Michigan silica cycle
Source: PLOS journal article supplement (doi:10.1371/journal.pone.0256838), 2021-08-26
Supplement: S3 (10.1371/journal.pone.0256838.s003) [file journal.pone.0256838.s003]

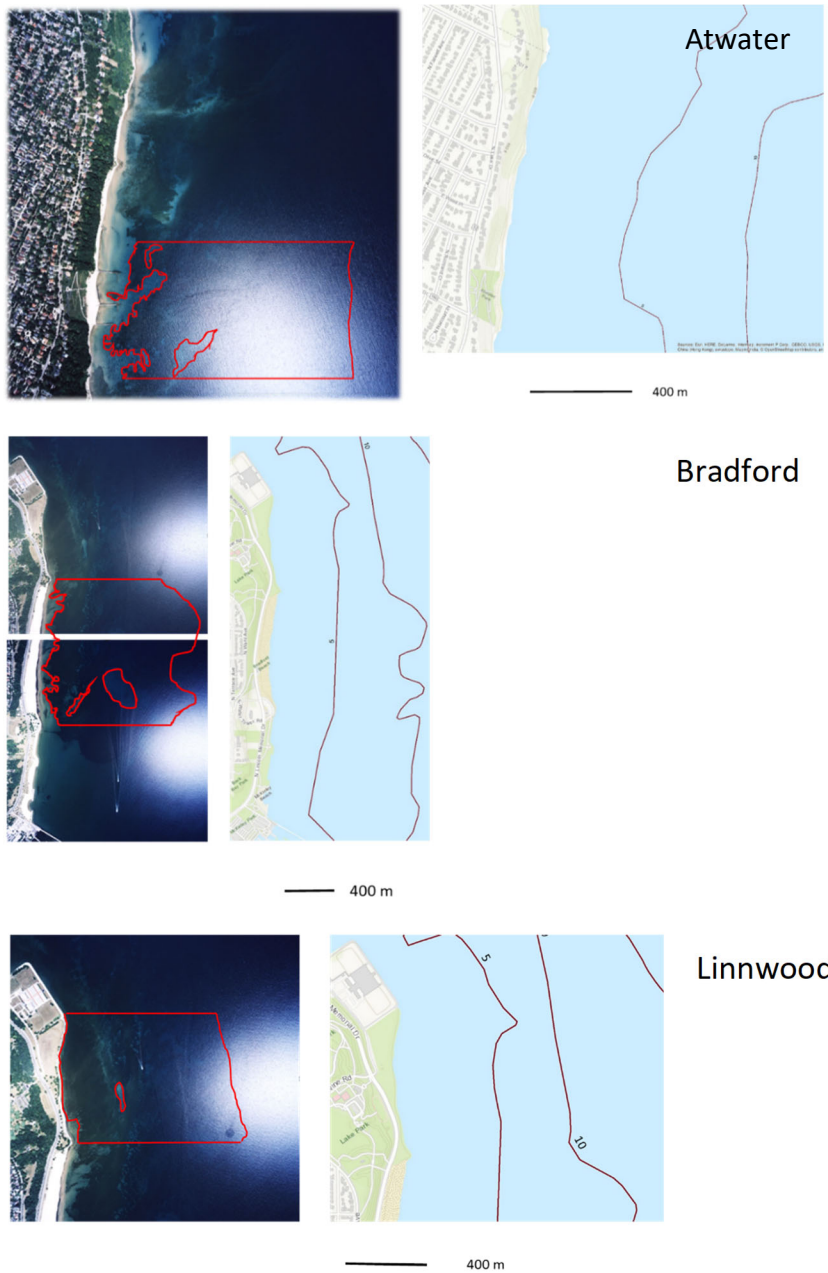

**S3 Fig. Images showing the nearshore regions of three Milwaukee areas beaches examined in *Cladophora* modeling.** Aerial photographs (Source: SSEC RealEarth, UW-Madison, [re.ssec.wisc.edu/?products=WICoast.100&center=43.086,-87.864&zoom=13](https://re.ssec.wisc.edu/?products=WICoast.100&center=43.086,-87.864&zoom=13)) and matching geo-referenced charts with depth contours (created by the authors in ESRI's ArcGIS v.10.6; no copyrighted material was used) for three sites near Milwaukee, Wisconsin. Regions outlined in red represent the extent of benthic *Cladophora* distributions selected down to the 10 m depth contour.
